# Supplementary material
Source: PubMed Central journal article supplement (PMC8991675)

(A) PB2

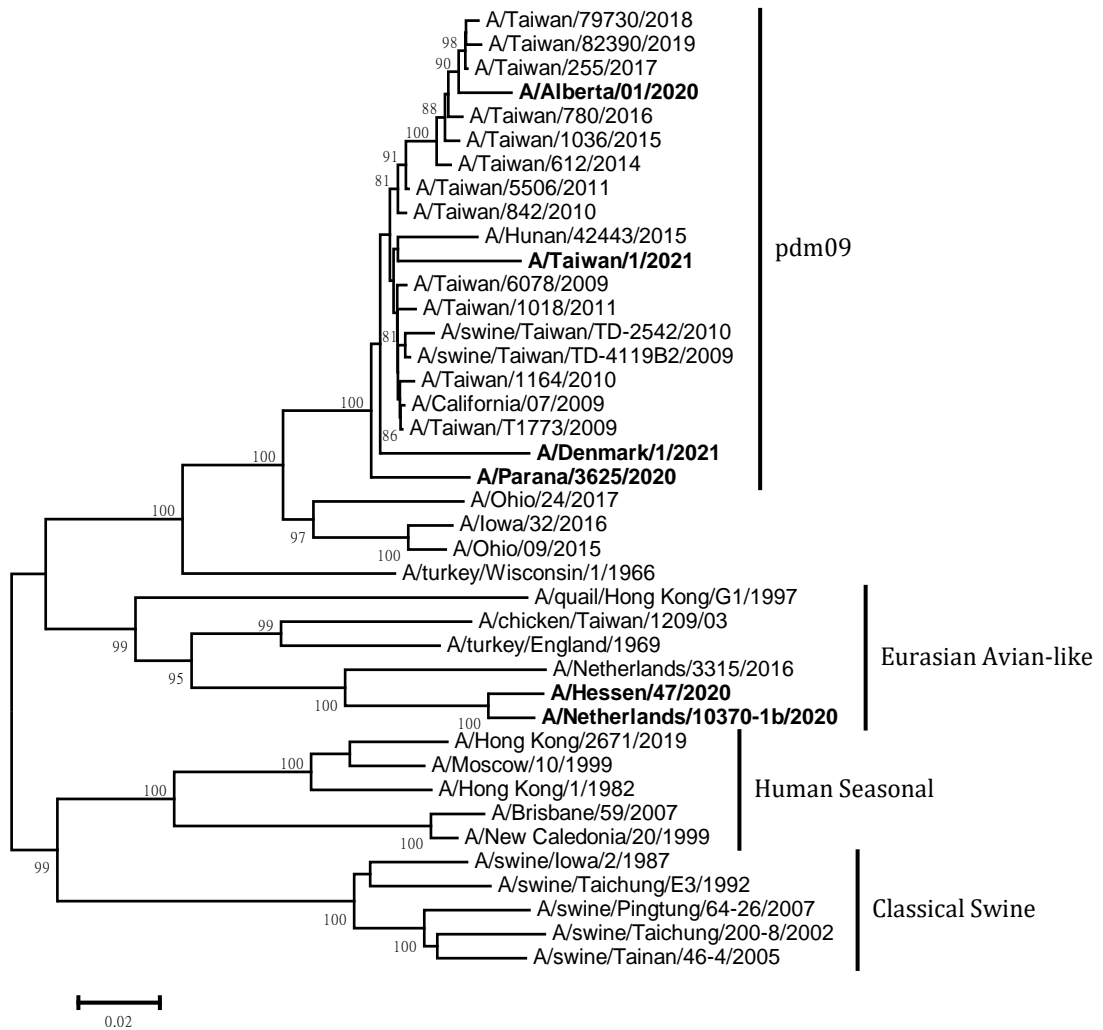

(B) PB1

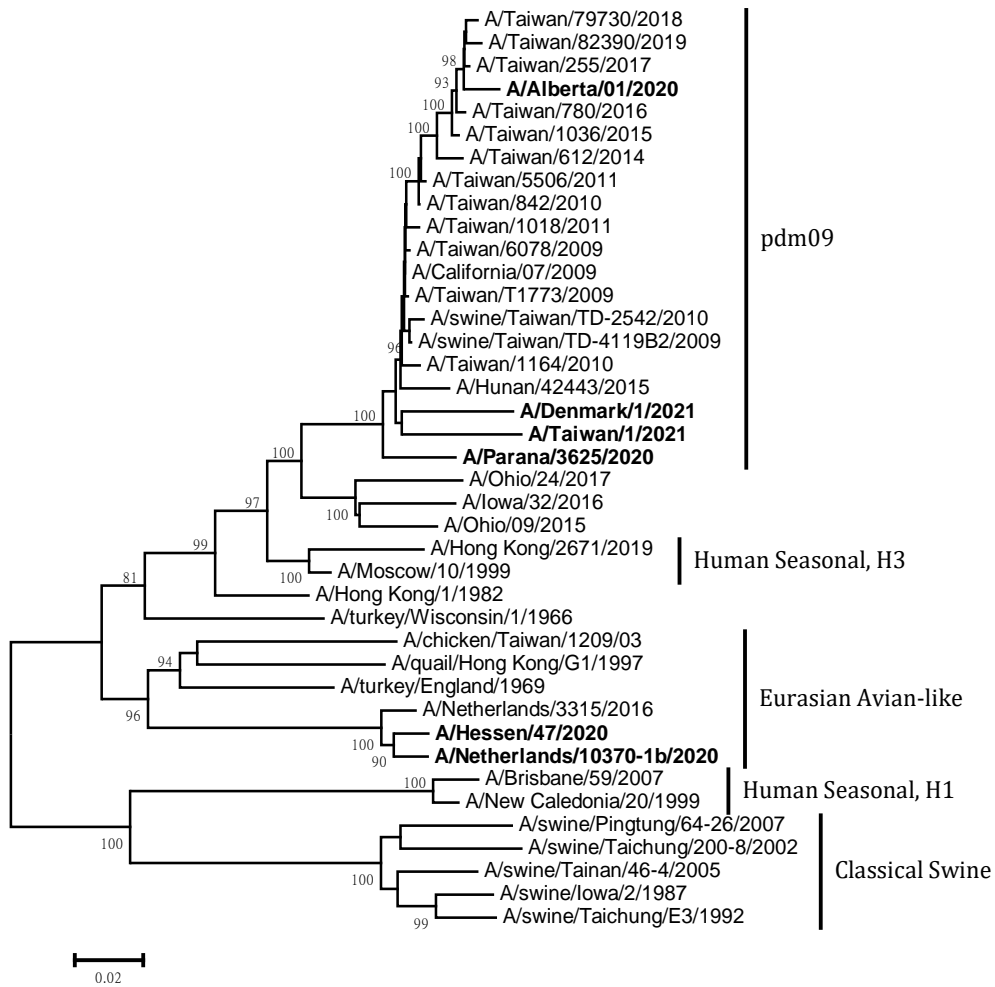

(C) PA

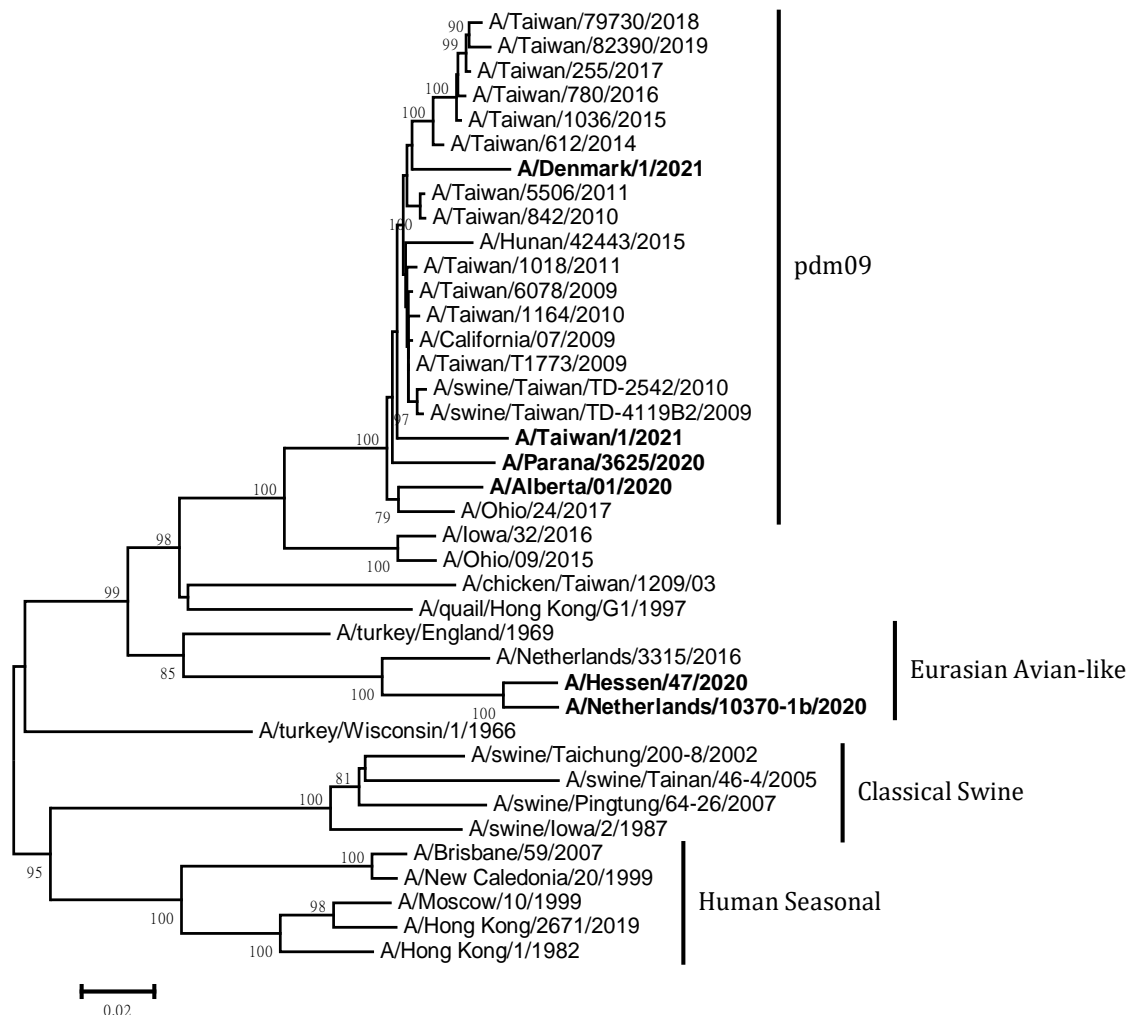

(D) NP

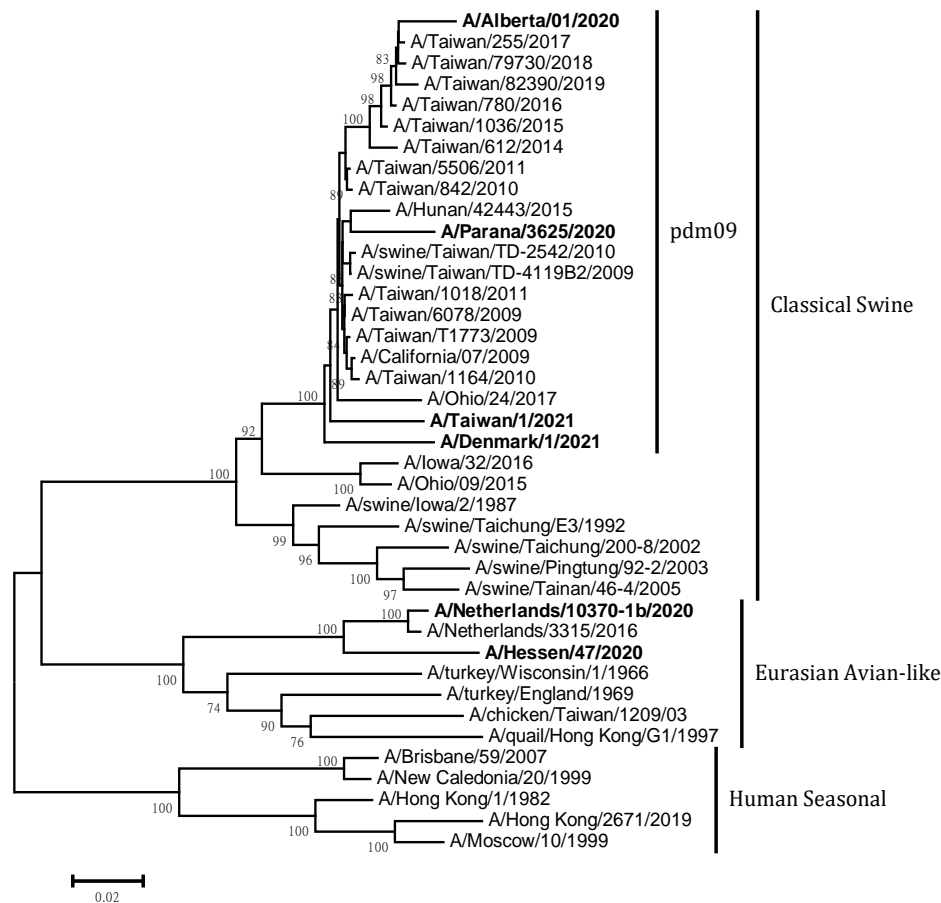

(E) M

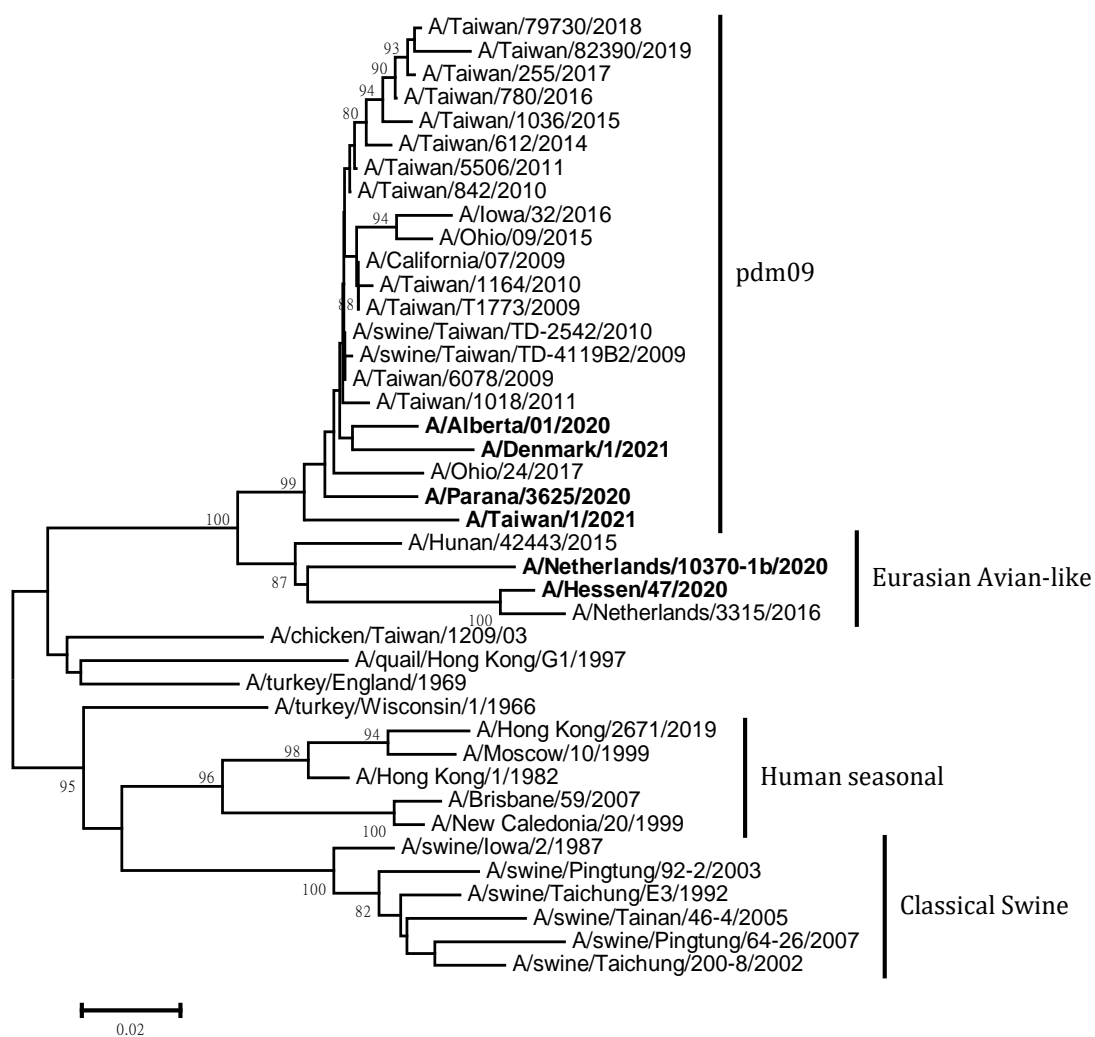

(F) NS

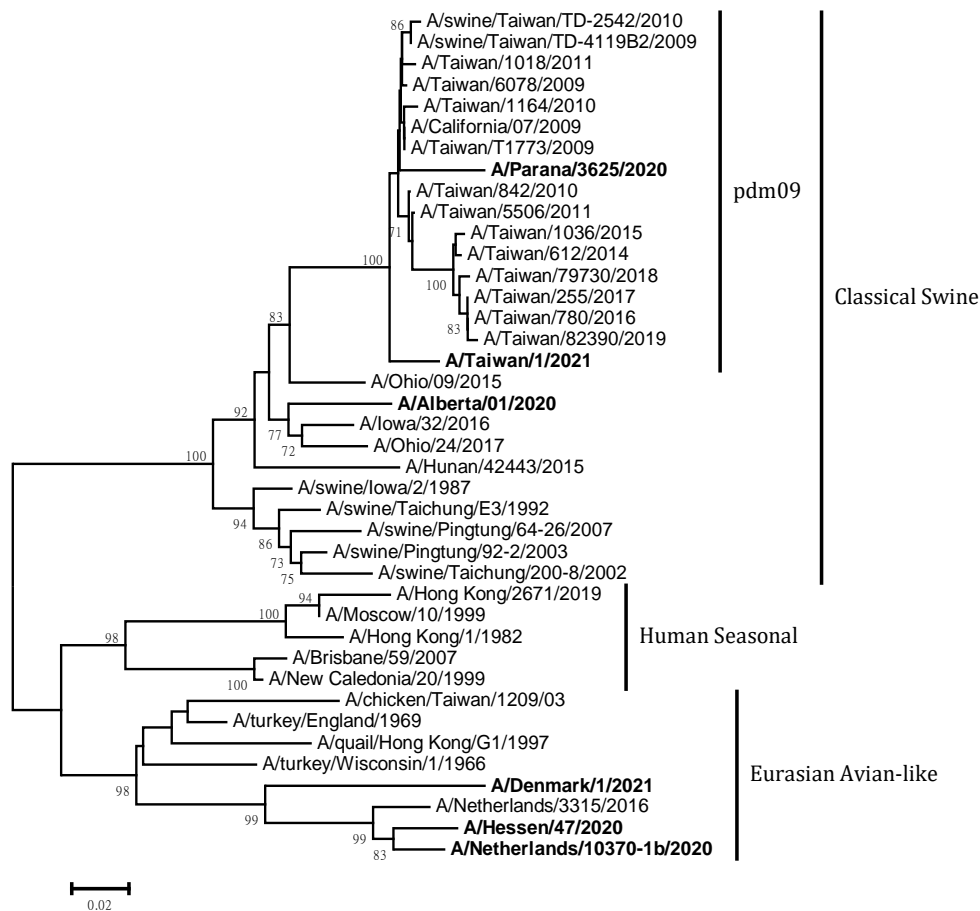

Supplement: 12985_2022_1794_MOESM2_ESM.pdf [file 12985_2022_1794_MOESM2_ESM.pdf]
